# Supplementary material
Source: Royal Society of Chemistry journal article supplement (doi:10.1039/d6cc00832a)
Supplement: d6cc00832a1.pdf [file d6cc00832a1.pdf]

## Supporting Information

### **Mechanically Alloyed CdGeP<sub>2</sub> Coupled with Optimized Conductive Frameworks for Ultrafast Lithium Storage**

Zedong Li<sup>a,1</sup>, Wei Pan<sup>b,1</sup>, Yuanxia Zhang<sup>a</sup>, Hongming Zhang<sup>a</sup>, Haipeng Wang<sup>a</sup>, Pengfei Hou<sup>a</sup>, Xinxin Wang<sup>a</sup>, Jingjing Chen<sup>a</sup>, Chenlong Dong<sup>a,b,\*</sup> and Zhiyong Mao<sup>a,b,\*</sup>

<sup>a</sup> Tianjin Key Laboratory for Photoelectric Materials and Devices, School of Materials Science and Engineering, Tianjin University of Technology, Tianjin 300384, PR China

<sup>b</sup> School of Electrical Engineering and Automation, Tianjin University of Technology, Tianjin 300384, PR China

<sup>1</sup> These authors contributed equally to this work.

Email: mzhy1984@163.com (Prof. Zhiyong Mao), dongchenlong@email.tjut.edu.cn (Assoc. Prof. Chenlong Dong)

## **Experimental Section**

### **Preparation of metallic phosphides**

The CdGeP<sub>2</sub> anode was synthesized by mechanochemical method *via* high-energy ball milling (HEBM). Stoichiometric amounts of Cd particle (Macklin, 99.99%), Ge powder (Macklin, 99.99%), and red P particle (Macklin, 99.5%) were ground by mortar and pestle and then loaded into a stainless-steel milling jar with stainless-steel balls (ball-to-powder ratio: 25). The jar was sealed in Ar-filled glovebox to prevent oxidation. The milling process was carried out using a high-energy planetary ball mill (MSK-SFM-3, Hefei Kejing Materials Technology Co., Ltd.) at a fixed rotating speed of 1200 rpm for 12 h (a half-hour break every two hours). The CdP<sub>2</sub> and GeP<sub>2</sub> reference samples were synthesized individually by adding the corresponding single metal source.

### **Synthesis of phosphides/carbon composites**

To fabricate the carbon-composited materials, the as-synthesized phosphides were first homogeneously mixed with various carbonaceous materials, and then ball-milled for 2 h at a rotating speed of 1200 rpm (ball-to-powder ratio: 25) under Ar protection. The carbonaceous materials included acetylene black (AB), carbon nanotubes (CNTs) and graphene oxide (GO). The mass ratio of phosphides to the carbonaceous material was fixed at 7:2.

### **Materials Characterizations**

X-ray diffraction (XRD) patterns were acquired on an ARL EQUINOX 3000 diffractometer (Thermo Fisher Scientific) employing Cu K $\alpha$  radiation ( $\lambda = 0.15406$  nm) to obtain the crystal structure information, with data collected over a  $2\theta$  range from 10° to 80°. The microstructure was examined using scanning electron microscopy (SEM, Quanta FEG, USA). The composition and crystal phase were further investigated by transmission electron microscopy (TEM) on a JEOL JEM-F200 instrument equipped with the ability to collect elemental information in high angle annular dark field-scanning transmission electron microscopy (HAADF-STEM) mode. X-ray photoelectron spectroscopy (XPS) measurements were performed on an Axis Ultra spectrometer (Kratos Analytical) with Al K $\alpha$  monochromatic radiation ( $h\nu = 1486.7$  eV) to determine the elemental valence states, and all binding energies were referenced to the adventitious carbon C 1s peak at 284.8 eV.

## Electrochemical measurements

The anode slurry was prepared by homogenously mixing the active material, acetylene black, and polyvinylidene fluoride (PVDF) binder in a mass ratio of 7:2:1, using N-methyl-2-pyrrolidone (NMP) as the solvent. This resultant slurry was subsequently coated onto a Cu current collector employing a doctor-blade technique. The coated electrode was then dried overnight at 80°C. The dried electrode was punched into  $\Phi$  12 mm discs with an active mass loading of  $\sim 1.3 \text{ mg cm}^{-2}$ . CR2016-type half-cells were assembled in an argon-filled glovebox, where the concentrations of  $\text{H}_2\text{O}$  and  $\text{O}_2$  were maintained below 0.01 ppm. A Li foil served as both the counter and reference electrode, while a glass fiber membrane (Whatman) was used as the separator. The electrolyte used was 1 M  $\text{LiPF}_6$  in a mixture of ethylene carbonate (EC) and diethyl carbonate (DEC) (*w/w*, 1:1) with 10 *wt.*% fluoroethylene carbonate (FEC) and 1 *wt.*% vinylene carbonate (VC) as additives. The galvanostatic charge/discharge tests for cyclic and rate performance evaluations were conducted on a LAND CT2001A battery test system within a potential window of 0.01–2.0 V (*vs.*  $\text{Li/Li}^+$ ) at ambient temperature. Cyclic voltammetry (CV) and electrochemical impedance spectroscopy (EIS) measurements were performed using a CHI 760E electrochemical workstation (Shanghai Chenhua Technology Co., Ltd.). The CV tests were carried out between 0.01 and 2 V (*vs.*  $\text{Li/Li}^+$ ) at different scan rates. EIS spectra were acquired in the frequency range from 100 kHz to 0.01 Hz with an amplitude of 5 mV. The galvanostatic intermittent titration technique (GITT) was employed by involving a constant current pulse of  $0.05 \text{ A g}^{-1}$  for 30 min followed by a relaxation step for 60 min. The cathode slurry was prepared by homogenously mixing the  $\text{LiFePO}_4$  (LFP), acetylene black, and PVDF binder in a mass ratio of 8:1:1 using NMP as the solvent. Coin-type full cell ((+)  $\text{LFP}||\text{CdGeP}_2/\text{GO}$  (–)) was assembled by applying LFP cathode and  $\text{CdGeP}_2/\text{GO}$  anode with a N/P ratio of 1.1. Before assembling, the  $\text{CdGeP}_2/\text{GO}$  anode was pre-cycled for 3 cycles.

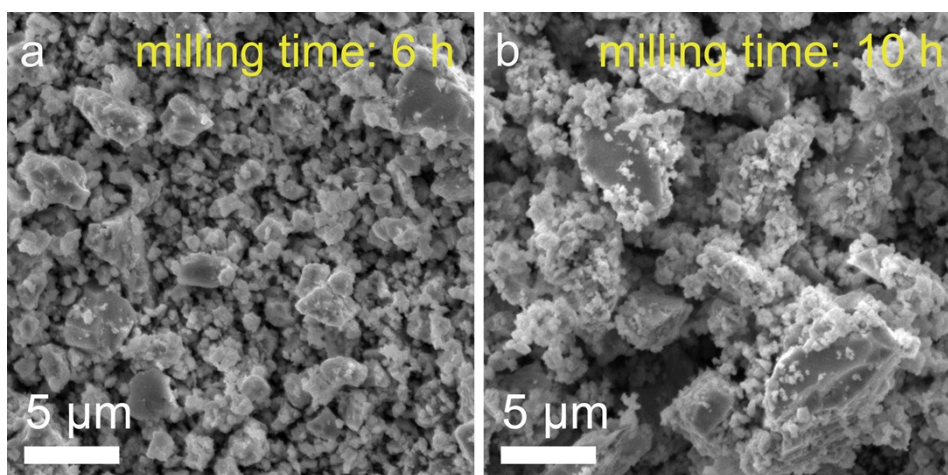

**Figure S1.** SEM images of CdGeP<sub>2</sub> samples ball-milled for (a) 6 and (b) 10 h.

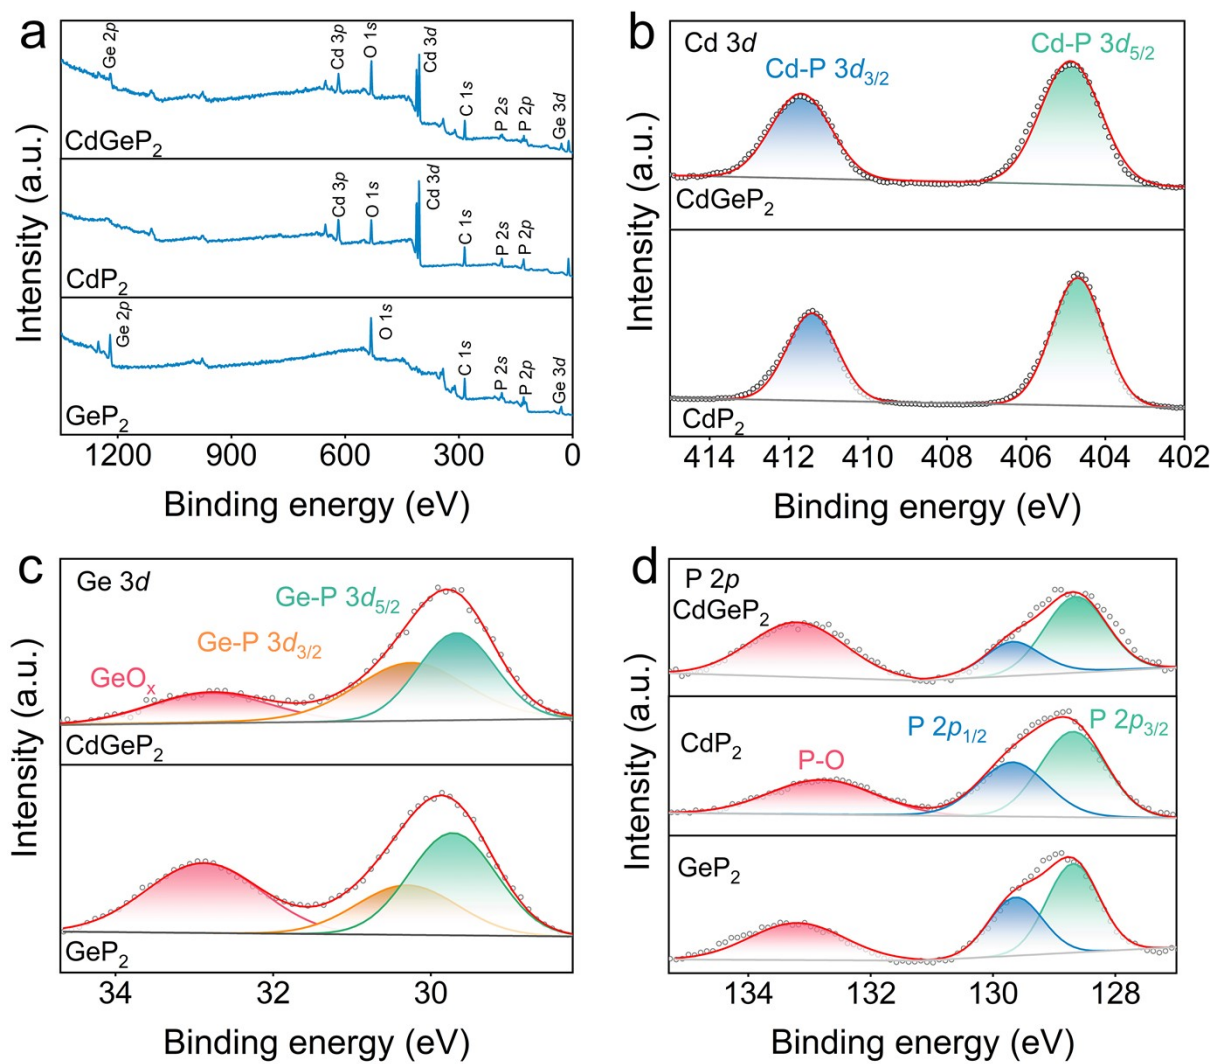

**Figure S2.** (a) XPS survey spectra of CdGeP<sub>2</sub>, CdP<sub>2</sub> and GeP<sub>2</sub>. High-resolution (b) Cd 3d, (c) Ge 3d and (d) P 2p spectra of CdGeP<sub>2</sub>, CdP<sub>2</sub> and GeP<sub>2</sub>.

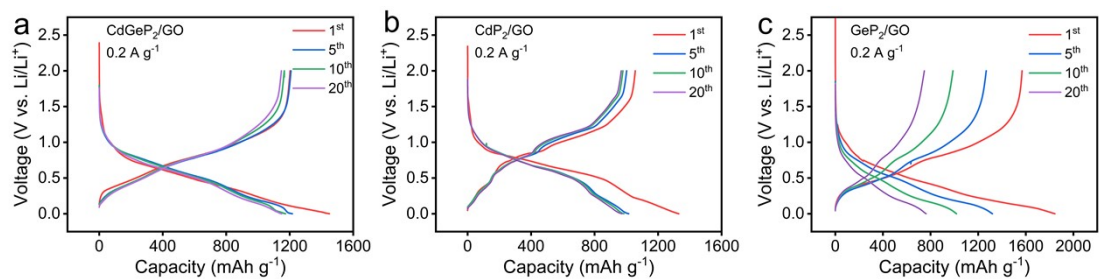

**Figure S3.** GCD curves of (a) CdGeP<sub>2</sub>/GO, (b) CdP<sub>2</sub>/GO and (c) GeP<sub>2</sub>/GO within 20 cycles at 0.2 A g<sup>-1</sup>.

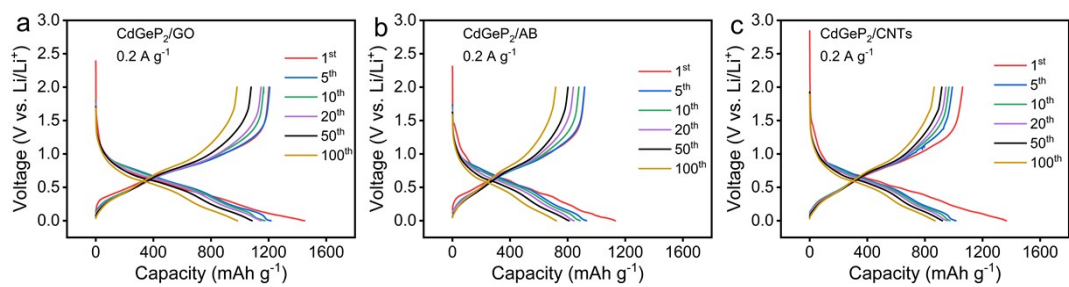

**Figure S4.** GCD curves (a) CdGeP<sub>2</sub>/GO, (b) CdGeP<sub>2</sub>/AB and (c) CdGeP<sub>2</sub>/CNTs within 100 cycles at 0.2 A g<sup>-1</sup>.

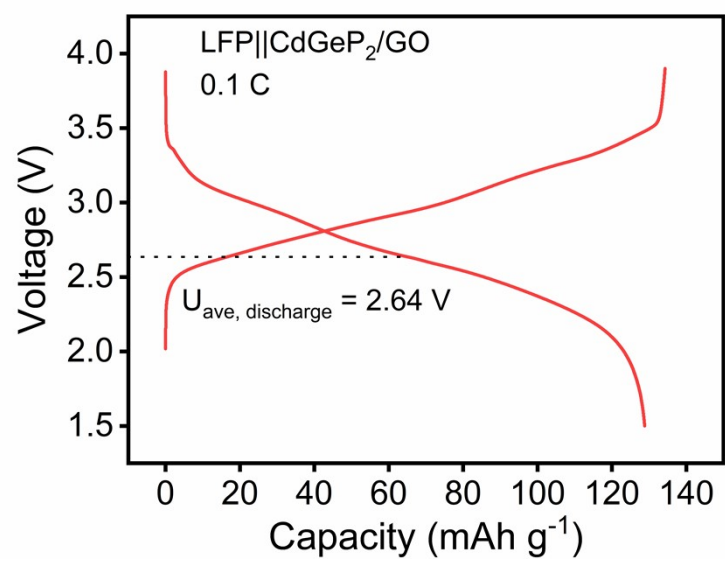

**Figure S5.** GCD curves of LFP||CdGeP<sub>2</sub>/GO at the 1<sup>st</sup> cycle at 0.1 C within 1.5–3.9 V (1 C = 125 mA g<sup>-1</sup>).

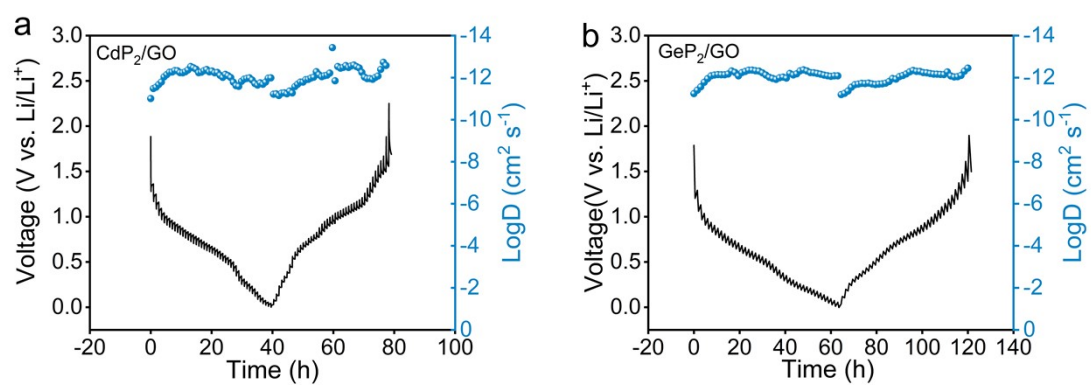

**Figure S6.** GITT curves of (a) CdP<sub>2</sub>/GO and (b) GeP<sub>2</sub>/GO anodes and corresponding  $D_{Li^+}$  at various potentials.

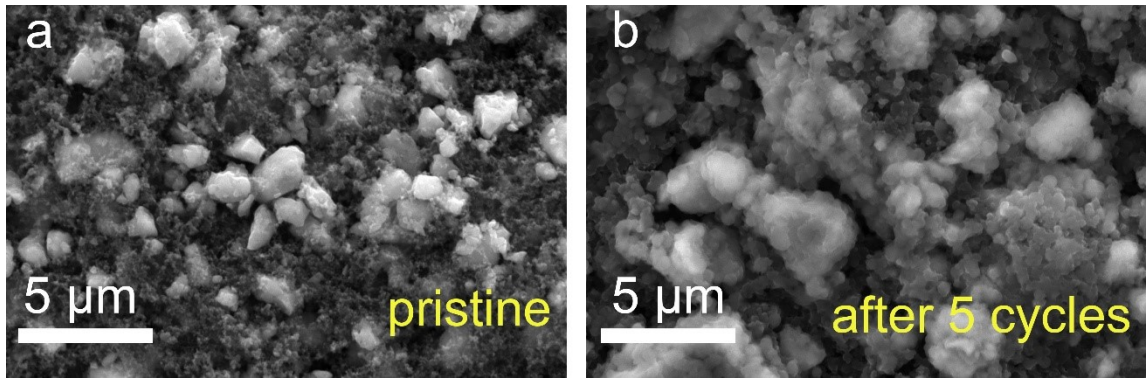

**Figure S7.** SEM images of the CdGeP<sub>2</sub>/GO electrode (a) before and (b) after 5 cycles.

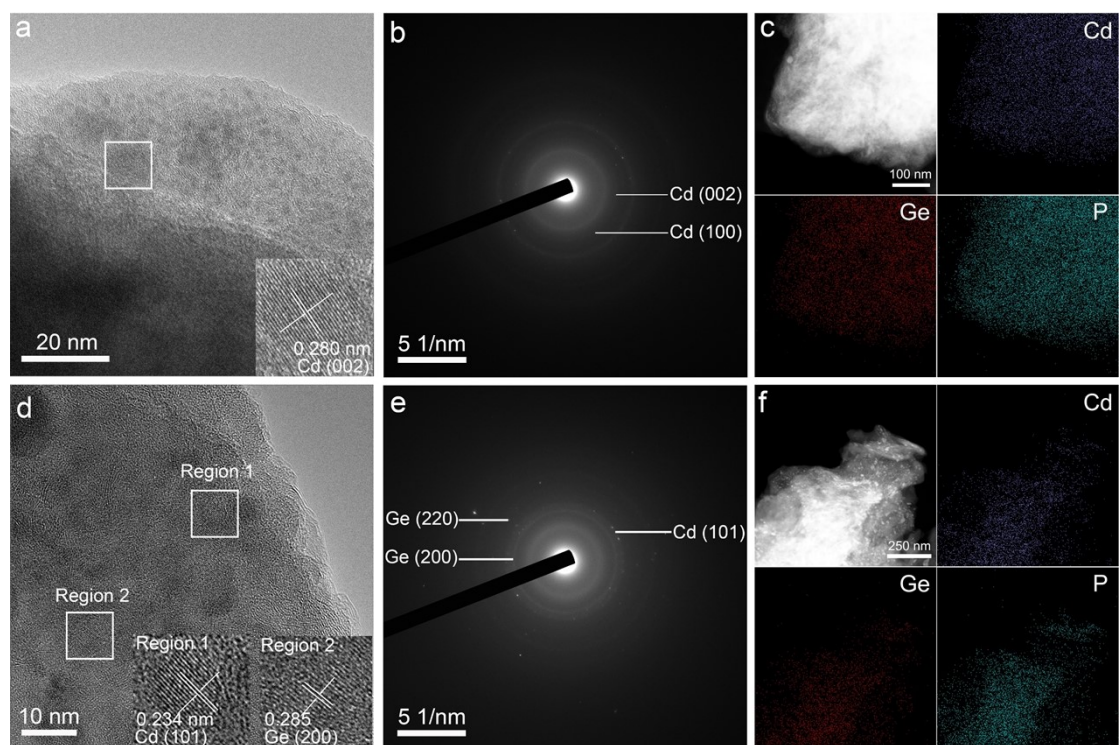

**Figure S8.** (a) *Ex situ* HRTEM, (b) SAED and (c) EDS mapping of CdGeP<sub>2</sub>/GO electrode at 0.7 V. (d) *Ex situ* HRTEM, (e) SAED and (f) EDS mapping of CdGeP<sub>2</sub>/GO electrode at 0.2 V.

**Table S1.** Comparison of electrochemical performance between CdGeP<sub>2</sub>/GO and Cd-based, Ge-based, and P-based anodes.

| Materials                           | Capacity at low current (mAh g <sup>-1</sup> @A g <sup>-1</sup> ) | Capacity at high current (mAh g <sup>-1</sup> @A g <sup>-1</sup> ) | Capacity (mAh g <sup>-1</sup> )@cycles@current (A g <sup>-1</sup> ) | Ref.      |
|-------------------------------------|-------------------------------------------------------------------|--------------------------------------------------------------------|---------------------------------------------------------------------|-----------|
| CdO/CNTs                            | 1100@0.1                                                          | 720@1.5                                                            | 810@100@0.1                                                         | 1         |
| Ge <sub>3</sub> N <sub>4</sub> @C   | 721.9@0.1                                                         | 288.3@2                                                            | 841.6@50@0.1                                                        | 2         |
| GeP <sub>3</sub> /C                 | 1235@0.1                                                          | 753@3 C(1 C=950 mAh g <sup>-1</sup> )                              | 845@100@0.1                                                         | 3         |
| SiGe                                | 2362@0.2                                                          | 666@1                                                              | 590@100@0.2                                                         | 4         |
| FeP@C                               | 825.7@0.1                                                         | 416.5@5                                                            | 902.4@100@0.1                                                       | 5         |
| FeP/SnP@C                           | 1140.7@0.2                                                        | 539@2                                                              | 756.1@200@0.2                                                       | 6         |
| Co <sub>3</sub> O <sub>4</sub> @CdS | 1292@0.1 C (1 C=891 mA h g <sup>-1</sup> )                        | 258@5 C                                                            | 760@200@0.1 C                                                       | 7         |
| CdGeP <sub>2</sub> /GO              | 1449.9@0.2                                                        | 576.5@10<br>369.9@15<br>156.2@20                                   | 981.5@100@0.2<br>674.4@500@1<br>374.8@500@10                        | This work |

## References

1. Feng, J., et al. Synthesis of nanosized cadmium oxide (CdO) as a novel high capacity anode material for lithium-ion batteries: influence of carbon nanotubes decoration and binder choice. *Electrochim. Acta* 129 (2014): 107-112.
2. Wu, Y., et al. Facile synthesis of Ge<sub>3</sub>N<sub>4</sub>@C nanostructures for high-performance lithium-ion batteries. *J. Energy Storage* 132 (2025): 117754.
3. Nam, K.-H., et al. Layered germanium phosphide-based anodes for high-performance lithium- and sodium-ion batteries. *Energy Storage Mater.* 17 (2019): 78-87.
4. Xiao, W., et al. Electrolytic Formation of Crystalline Silicon/Germanium Alloy Nanotubes and Hollow Particles with Enhanced Lithium-Storage Properties. *Angew. Chem.* 128 (2016): 7553-7557.
5. Zhang, X., et al. Shuttle-like carbon-coated FeP derived from metal-organic frameworks for lithium-ion batteries with superior rate capability and long-life cycling performance. *Carbon* 143 (2019): 116-124.
6. Li, J., et al. Long-Lasting Lithium-Ion Batteries Enabled by Advanced Anode Design of a Hydrangea-like FeP/SnP@C Heterostructure. *ACS Appl. Mater. Interfaces* 17 (2025): 12085-12094.
7. Waleed, H., et al. Mesoporous Co<sub>3</sub>O<sub>4</sub>@CdS nanorods as anode for high-performance lithium ion batteries with improved lithium storage capacity and cycle life. *RSC Adv.* 14 (2024): 11900-11907.
